# Supplementary material
Source: PubMed Central journal article supplement (PMC6535517)
Supplement: AAC.00342-19-s0001.pdf [file AAC.00342-19-s0001.pdf]

1 **Supplemental Material**

2

3 **Table S1.** Antibacterial specificity of PyS2-GN4 towards Gram-positive and Gram-negative  
4 bacteria.

| Gram-Positive      |          |                          | Gram-Negative        |            |                          |
|--------------------|----------|--------------------------|----------------------|------------|--------------------------|
| Species            | Strain   | MIC ( $\mu\text{g/ml}$ ) | Species              | Strain     | MIC ( $\mu\text{g/ml}$ ) |
| <i>B. cereus</i>   | RSVF1    | > 256                    | <i>A. baumannii</i>  | ATCC 17978 | > 256                    |
| <i>E. faecium</i>  | EFSK-2   | > 256                    | <i>E. cloacae</i>    | NR-50391   | > 256                    |
| <i>S. aureus</i>   | NR-45946 | > 256                    | <i>E. coli</i>       | ATCC 25922 | > 256                    |
| <i>S. pyogenes</i> | D471     | > 256                    | <i>K. pneumoniae</i> | NR-41916   | > 256                    |

5

6

7

8

9

10

11

12

13

14

15

16

17

18

19

20 **Table S2.** List of bacterial strains used in this study.

| Bacteria                        | Source                                           |
|---------------------------------|--------------------------------------------------|
| <i>A. baumannii</i> ATCC 17978  | ATCC                                             |
| <i>B. cereus</i> RSVF1          | Vincent Fischetti, The Rockefeller University    |
| <i>E. cloacae</i> NR-50391      | BEI Resources, NIAID, NIH                        |
| <i>E. coli</i> ATCC 25922       | ATCC                                             |
| <i>E. faecium</i> EFSK-2        | Alexander Tomasz, The Rockefeller University     |
| <i>K. pneumoniae</i> NR-41916   | BEI Resources, NIAID, NIH                        |
| <i>P. aeruginosa</i> ATCC 15692 | ATCC                                             |
| <i>P. aeruginosa</i> 442        | Lars Westblade, Weill Cornell Medical College    |
| <i>P. aeruginosa</i> 443        | Lars Westblade, Weill Cornell Medical College    |
| <i>P. aeruginosa</i> 445        | Lars Westblade, Weill Cornell Medical College    |
| <i>P. aeruginosa</i> 446        | Lars Westblade, Weill Cornell Medical College    |
| <i>P. aeruginosa</i> 448        | Lars Westblade, Weill Cornell Medical College    |
| <i>P. aeruginosa</i> 449        | Lars Westblade, Weill Cornell Medical College    |
| <i>P. aeruginosa</i> 450        | Lars Westblade, Weill Cornell Medical College    |
| <i>P. aeruginosa</i> 451        | Lars Westblade, Weill Cornell Medical College    |
| <i>P. aeruginosa</i> 452        | Lars Westblade, Weill Cornell Medical College    |
| <i>P. aeruginosa</i> 453        | Lars Westblade, Weill Cornell Medical College    |
| <i>P. aeruginosa</i> MDR-M-3    | Daniel Green, Columbia University Medical Center |
| <i>S. aureus</i> NR-45946       | BEI Resources, NIAID, NIH                        |
| <i>S. pyogenes</i> D471         | The Rockefeller University Lancefield Collection |

21  
22 ATCC, American Type Culture Collection; NIAID, National Institute of Allergy and Infectious  
23 Disease; NIH, National Institutes of Health  
24

25

26

27

28

29 **Table S3.** List of primers used in this study.

| Oligonucleotide | Nucleotide Sequence                                        |
|-----------------|------------------------------------------------------------|
| GN4_F           | 5'-AACTTTAAGAAGGAGATATAATGCGCACCAGCCAGCGC-3'               |
| GN4_R           | 5'-GTCGACGGAGCTCGAATTCGGATCCTTAGCTCAGCGGTTCCAGAAACAGTGC-3' |
| PyS2_F          | 5'-AACTTTAAGAAGGAGATATACCATGGCCGTGAACGATTATG-3'            |
| PyS2-GN4_R      | 5'-TGGTGCGCATCGGGTCACGAAACATCAC-3'                         |
| PyS2-GN4_F      | 5'-TCGTGACCCGATGCGCACCAGCCAGCGC-3'                         |
| PyS2-GN4ΔTBB_F  | 5'-[Phos]GTTTCAGGGTGGTGGTCGTGACATTATCCAG                   |
| PyS2-GN4ΔTBB_R  | 5'-[Phos]GCTGCCCGGCTCATAATCGTTCACGGCCATG                   |
| PyS2-GN4_KO_1F  | 5'-[Phos]CGCCTATCAGGCTAGCGTGGGTGTGTGGACC-3'                |
| PyS2-GN4_KO_1R  | 5'-[Phos]CTCAGGCGCAGGCCCTCAAAGCTCTTAATC-3'                 |
| PyS2-GN4_KO_2F  | 5'-[Phos]GCGTGGGTGTGTGGGCCATTGGTTATGGTAC-3'                |
| PyS2-GN4_KO_2R  | 5'-[Phos]TAGCCTGATAGGCGCTCAGGCGCAGGCC-3'                   |
| FpvAI_F         | 5'-CGAAGGCCAGAACTACGAGA-3'                                 |
| FpvAI_R         | 5'-TGTAGCTGGTGTAGAGGCTCAA-3'                               |
| FpvAII_F        | 5'-TACCTCGACGGCCTGCACAT-3'                                 |
| FpvAII_R        | 5'-GAAGGTGAATGGCTTGCCGTA-3'                                |
| FpvAIII_F       | 5'-ACTGGGACAAGATCCAAGAGAC-3'                               |
| FpvAIII_R       | 5'-CTGGTAGGACGAAATGCGAG-3'                                 |

30

31

32

33

34

35

36

37

38

39

40

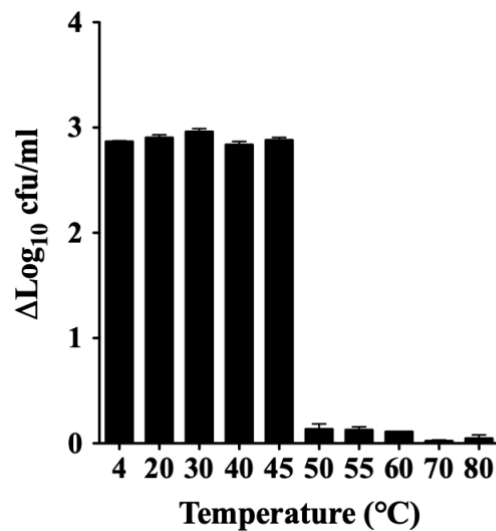

41  
42 **Figure S1.** Lysocin thermal stability. PyS2-GN4 was incubated in PBS for 30 min at  
43 temperatures ranging from 4°C to 80°C. After cooling on ice, each sample at 50  $\mu\text{g/ml}$  was  
44 incubated statically with *P. aeruginosa* strain 453 for a total of 4 h at 37°C. The average residual  
45 antipseudomonal activity of each sample was equated to the  $\log_{10}$  decrease in viable bacterial  
46 cells when compared to the untreated control. All error bars correspond to  $\pm$  SEM of triplicate  
47 experiments.

48

49

50

51

52

53

54

55

56

57 **SI Methods**

58 *Determining Thermal Stability*

59 Using an EchoTherm™ bench-top incubator (Torrey Pines Scientific), PyS2-GN4 was initially  
60 incubated at 1 mg/ml in PBS, pH 7.4, for 30 min at temperatures ranging from 4°C to 80°C.  
61 Following temperature treatment, the lysocin was immediately cooled on ice. Residual  
62 antipseudomonal activity was determined by incubating each lysocin sample at 50 µg/ml with *P.*  
63 *aeruginosa* strain 453 at 10<sup>6</sup> cfu/ml in CAA medium with EDDHA for a total of 4 h at 37°C. The  
64 samples were plated on CAA agar in order to calculate viable cell counts. A control absent of  
65 lysocin was included.

66

67

68

69
